# Supplementary material for: Piscine orthoreovirus can infect and shed through the intestine in experimentally challenged Atlantic salmon (Salmo salar L.)
Source: Springer Nature journal article supplement (doi:10.1186/s13567-016-0343-z), 2016-05-23

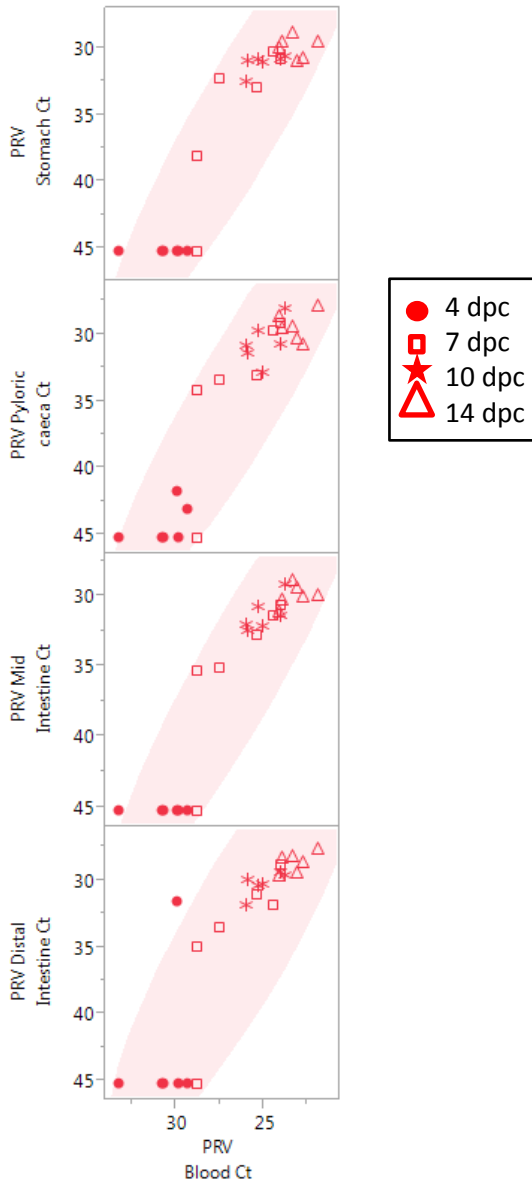

Supplement: MOESM1 [file 13567_2016_343_MOESM1_ESM.pdf]
